# Supplementary material for: An elbow exoskeleton for haptic feedback made with a direct drive hobby motor
Source: PubMed Central journal article supplement (PMC9041254; doi:10.1016/j.ohx.2020.e00153), 2020-10-22
Supplement: mmc1.pdf [file mmc1.pdf]

The Design Files are located at: <http://dx.doi.org/10.17632/skm88ynyhv.4>
